# Supplementary material for: Histone methyltransferase G9a protects against acute liver injury through GSTP1
Source: PubMed Central journal article supplement (PMC7206029; doi:10.1038/s41418-019-0412-8), 2019-09-12
Supplement: 41418_2019_412_MOESM1_ESM.pdf [file 41418_2019_412_MOESM1_ESM.pdf]

# Supplementary Materials

## **Histone methyltransferase G9a protects against acute liver injury through GSTP1**

*Short title: G9a-GSTP1/2 axis in acute liver injury*

Yu Zhang<sup>1†</sup>, Weili Xue<sup>2†</sup>, Wenquan Zhang<sup>2</sup>, Yangmian Yuan<sup>2</sup>, Xiuqin Zhu<sup>2</sup>, Qing Wang<sup>2</sup>, Yujuan Wei<sup>1</sup>,  
Dong Yang<sup>1</sup>, Chen Yang<sup>1</sup>, Yan Chen<sup>1</sup>, Yu Sun<sup>2</sup>, Shun Wang<sup>3</sup>, Kun Huang<sup>1\*</sup> and Ling Zheng<sup>2\*</sup>

<sup>1</sup>Tongji School of Pharmacy, Tongji Medical College, Huazhong University of Science and Technology, Wuhan, Hubei, P. R. China, 430030

<sup>2</sup>Hubei Key Laboratory of Cell Homeostasis, College of Life Sciences, Wuhan University, Wuhan, Hubei, P. R. China, 430072

<sup>3</sup>Department of Blood Transfusion, Wuhan Hospital of Traditional and Western Medicine, Wuhan, China, 430022

† These two authors contributed equally to this work.

\* Corresponding author. Email: [lzheng@whu.edu.cn](mailto:lzheng@whu.edu.cn) (L.Z.); [kunhuang@hust.edu.cn](mailto:kunhuang@hust.edu.cn) (K.H.)

This supplementary information contains thirteen figures, one table and three videos.

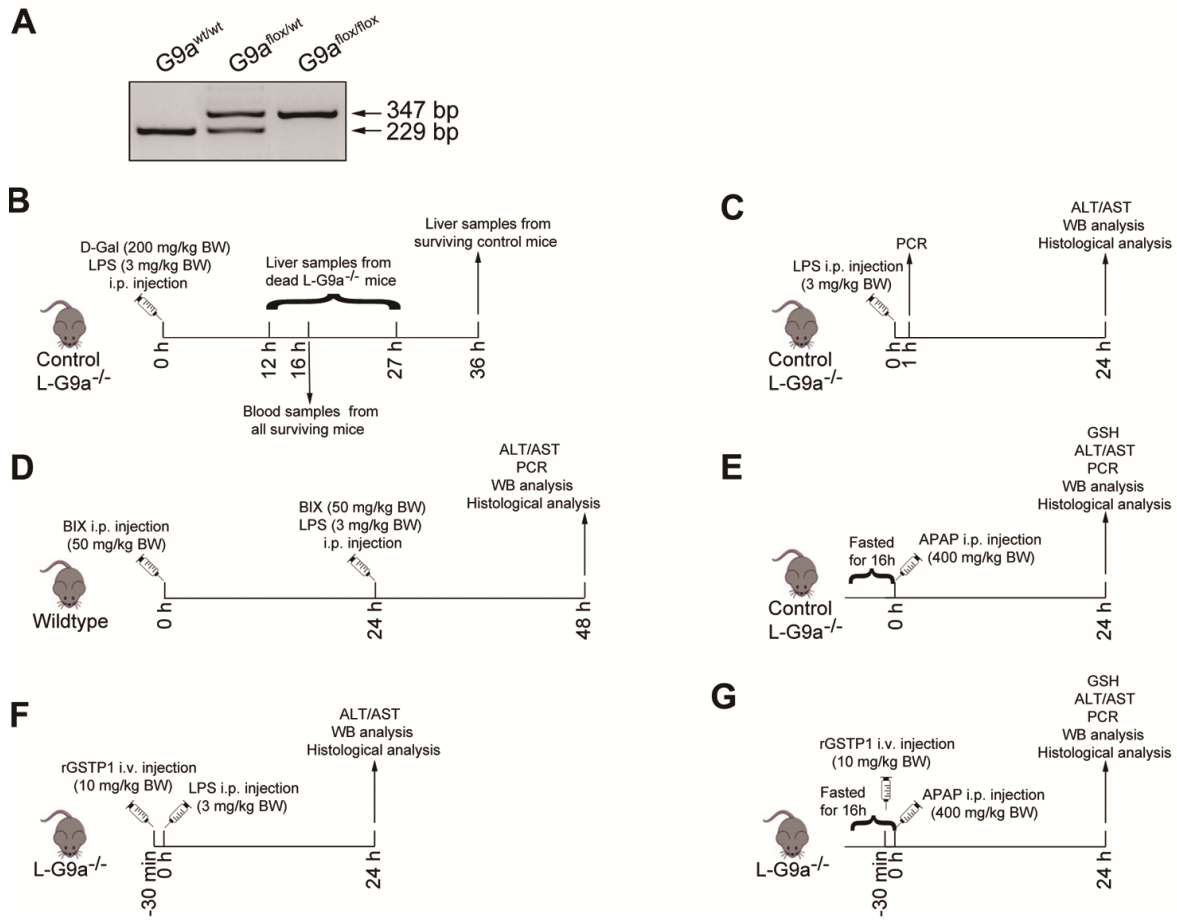

23

24 **Fig. S1. Experimental design.** (A) Genotype analysis by using genomic DNA extracted from the tails  
 25 to demonstrated three genotypes of mouse. (B-G) Experimental design flowcharts of LPS/D-Gal-  
 26 induced acute liver injury (B), LPS-induced acute liver injury (C), BIX and LPS co-treatment (D),  
 27 APAP-induced acute liver injury (E), rGSTP1 treatment for L-G9a<sup>-/-</sup> mice under LPS injection (F) and  
 28 APAP injection (G). BW, body weight.

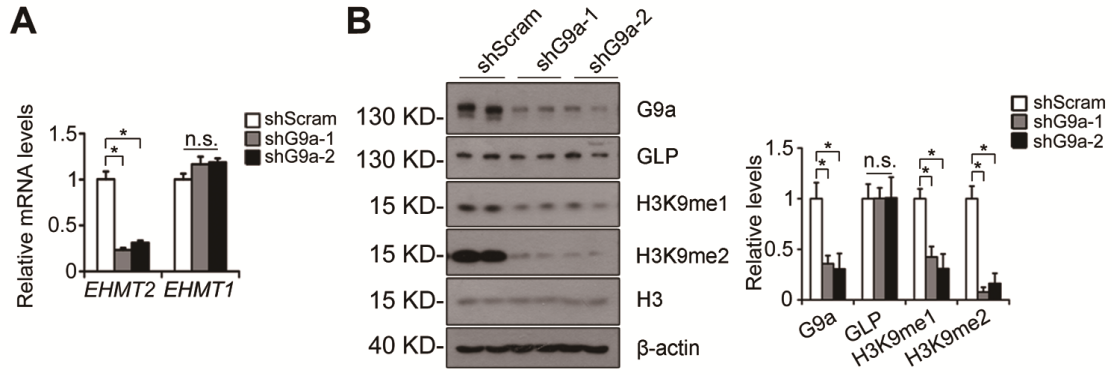

29

30 **Fig. S2. Downregulation of G9a does not affect the expression level of GLP in HepG2 cells and in**

31 **the livers after LPS treatment. (A) Relative mRNA level of *EHMT1/2* in control or two different**

32 **shG9a stable HepG2 cell lines. (B) Representative western blots (*left*) and the quantitative results (*right*)**

33 **for G9a, GLP and H3K9me1/me2 in the control or two different shG9a stable HepG2 cells. H3 and  $\beta$ -**

34 **actin serve as the loading control. n=6; \*  $p < 0.05$ .**

35

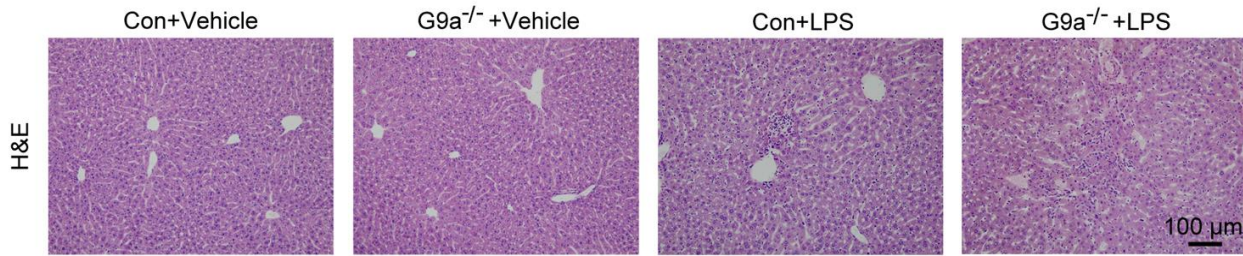

36

37 **Fig. S3. Hepatic G9a deletion aggravates LPS-induced liver damage in male mice.** H&E staining in

38 livers after LPS injection. n=3-4 per group; scale bar, 100 μm.

39

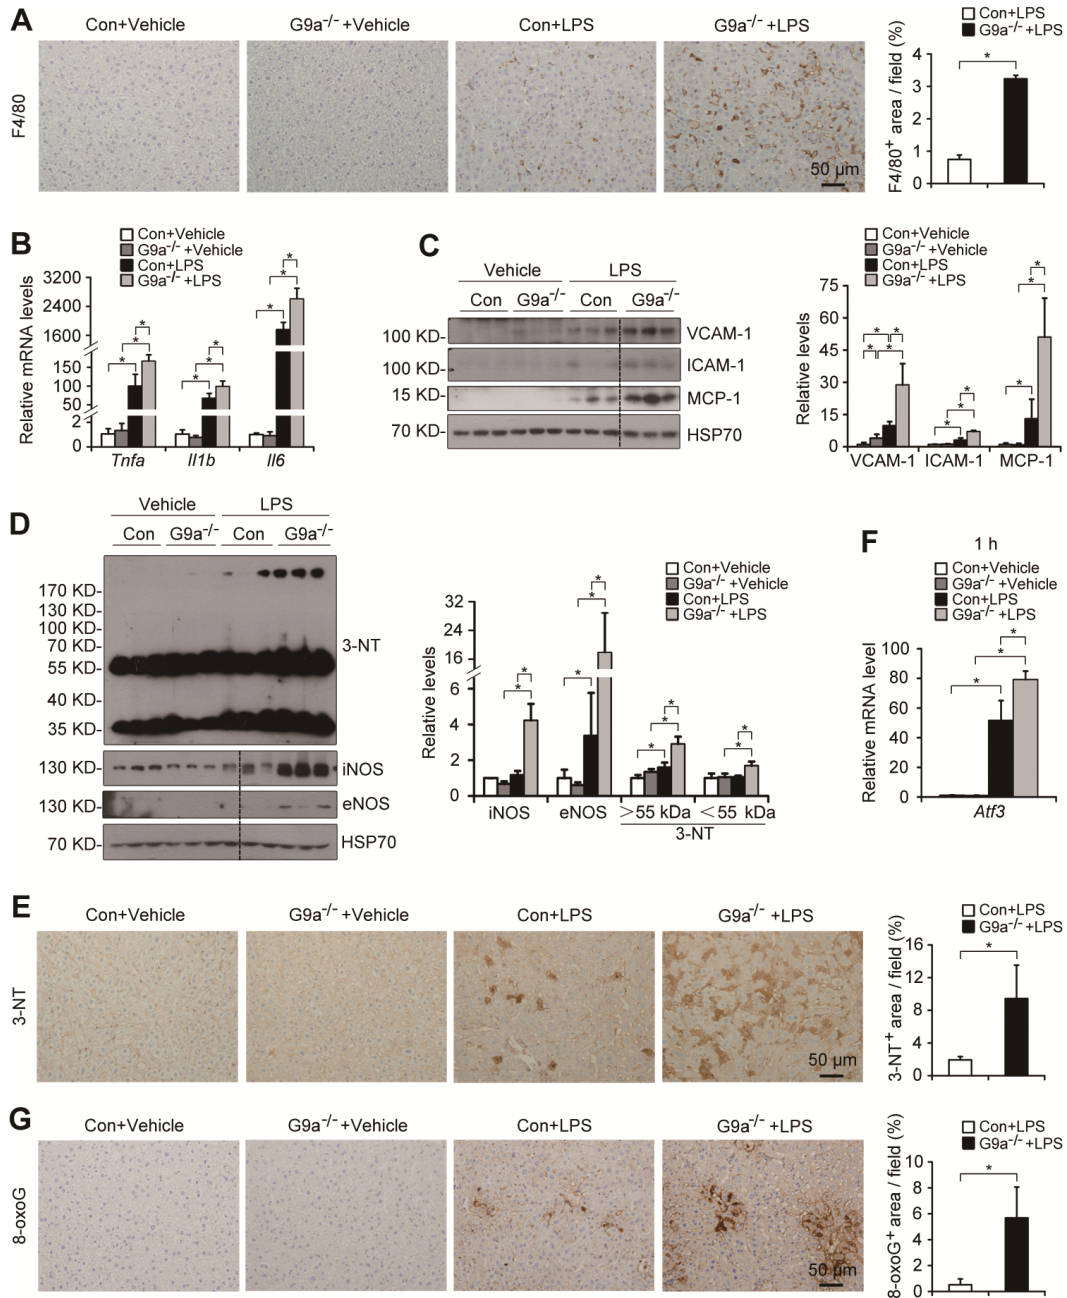

40

41 **Fig. S4. Hepatic G9a deletion augments LPS-induced inflammation and RNS/ROS production in**  
 42 **female mice.** (A) Representative pictures for F4/80 staining in livers (*left*) and quantitative results  
 43 (*right*). (B) qPCR results of the indicated genes in livers of different groups. (C-D) Representative  
 44 western blots (*left*) and quantitative results (*right*) for VCAM-1, ICAM-1 and MCP-1 (C), iNOS, eNOS  
 45 and 3-NT (D) in livers of different groups. HSP70 serves as the loading control. (E) Representative

46 pictures for 3-NT staining in livers (*left*) and quantitative results (*right*). (F) Relative mRNA level of  
47 *Atf3* in the livers at 1 hour after LPS injection. (G) Representative pictures for 8-oxoG staining in livers  
48 (*left*) and quantitative results (*right*). n=3-4 per group; 3-NT, 3-Nitrotyrosine; \* $p < 0.05$ ; scale bar, 50  
49  $\mu\text{m}$ .

50

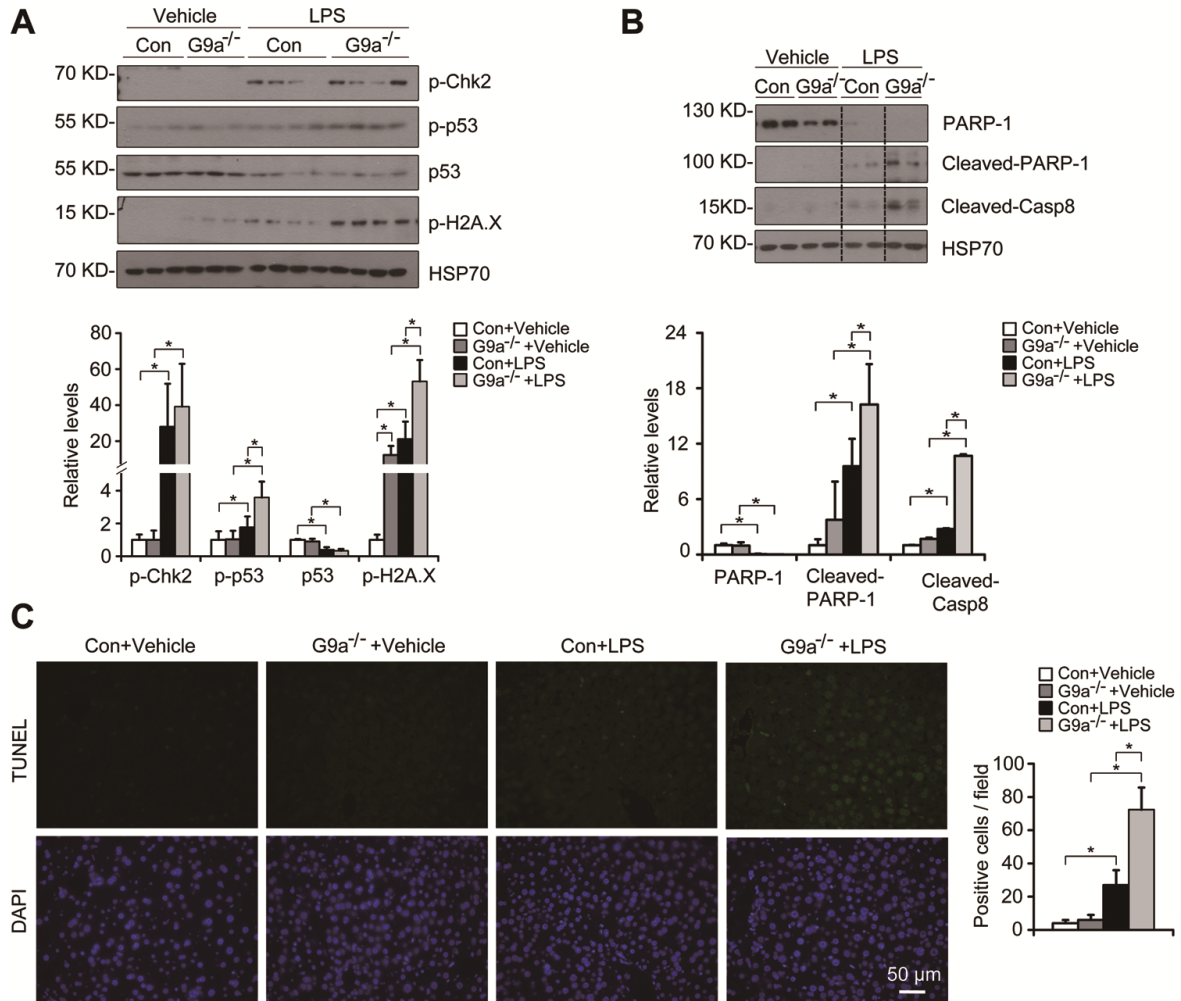

51

52 **Fig. S5. Hepatic G9a deletion augments DNA damage and hepatocyte apoptosis upon LPS**  
 53 **injection in female mice.** (A-B) Representative western blots (*up*) and quantitative results (*down*) for  
 54 markers of DNA damage response signaling (A) and apoptosis (B) in livers of different groups. HSP70  
 55 serves as the loading control. (C) Representative pictures for TUNEL staining in the livers (*left*) and  
 56 quantitative results (*right*). n=3-4 per group; \**p* < 0.05; scale bar, 50  $\mu$ m.

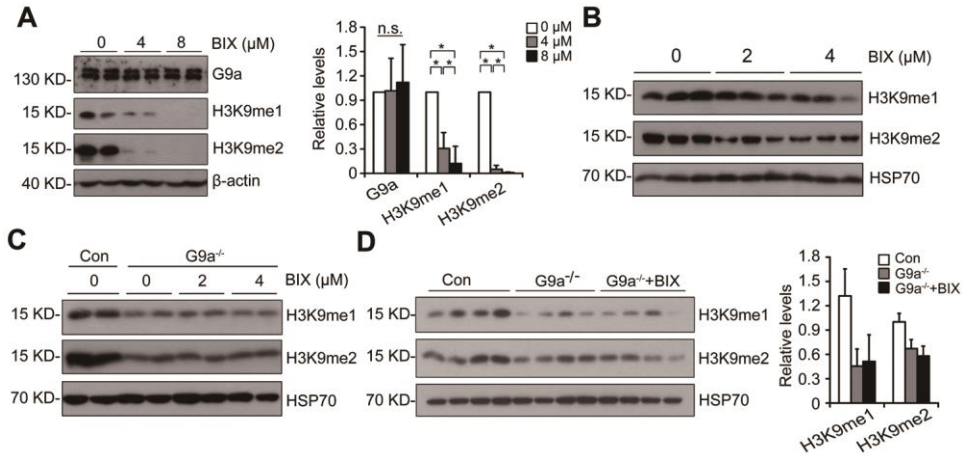

57

58 **Fig. S6. BIX01294 (BIX) does not further inhibit H3K9me1/me2 levels in the G9a-deficient**  
 59 **primary hepatocytes or livers. (A)** Representative western blots (*left*) and quantitative results (*right*)  
 60 for G9a, H3K9me1/me2 in HepG2 cells with indicated dosages of BIX. **(B-C)** Representative western  
 61 blots for H3K9me1/me2 in primary hepatocytes isolated from the control mice (*B*), as well as the control  
 62 and L-G9a<sup>-/-</sup> mice (*C*) treated with indicated dosages of BIX. **(D)** Representative western blots for  
 63 H3K9me1/me2 in livers of the control mice, L-G9a<sup>-/-</sup> mice and L-G9a<sup>-/-</sup> mice treated with BIX. β-actin  
 64 or HSP70 serves as the loading control. n=6; n.s., not significant; \* *p* < 0.05.

65



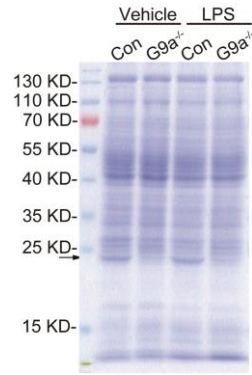

66

67 **Fig. S7. The protein expression profile in the liver of different groups.** Coomassie brilliant blue  
68 staining of whole liver extracts from control and L-G9a<sup>-/-</sup> mice with or without LPS i.p. injection. n=4  
69 per group.

**A**

| Name  | MW<br>(kDa) | Wildtype |                    |      | L-G9a <sup>-/-</sup> |                    |      | $\Delta$ PSMs |
|-------|-------------|----------|--------------------|------|----------------------|--------------------|------|---------------|
|       |             | Coverage | Unique<br>Peptides | PSMs | Coverage             | Unique<br>Peptides | PSMs |               |
| GSTP1 | 23.6        | 62.86    | 8                  | 884  | 59.05                | 8                  | 523  | 361           |
| GSTP2 | 23.5        | 48.57    | 2                  | 398  | 44.76                | 1                  | 273  | 125           |
| GSTA4 | 25.5        | 30.18    | 8                  | 51   | 30.18                | 8                  | 35   | 16            |
| MGST1 | 17.5        | 18.06    | 2                  | 22   | 7.74                 | 1                  | 9    | 13            |
| CATB  | 37.3        | 13.57    | 5                  | 30   | 15.93                | 5                  | 20   | 10            |
| SPRE  | 27.9        | 22.99    | 5                  | 10   | 3.83                 | 1                  | 1    | 9             |

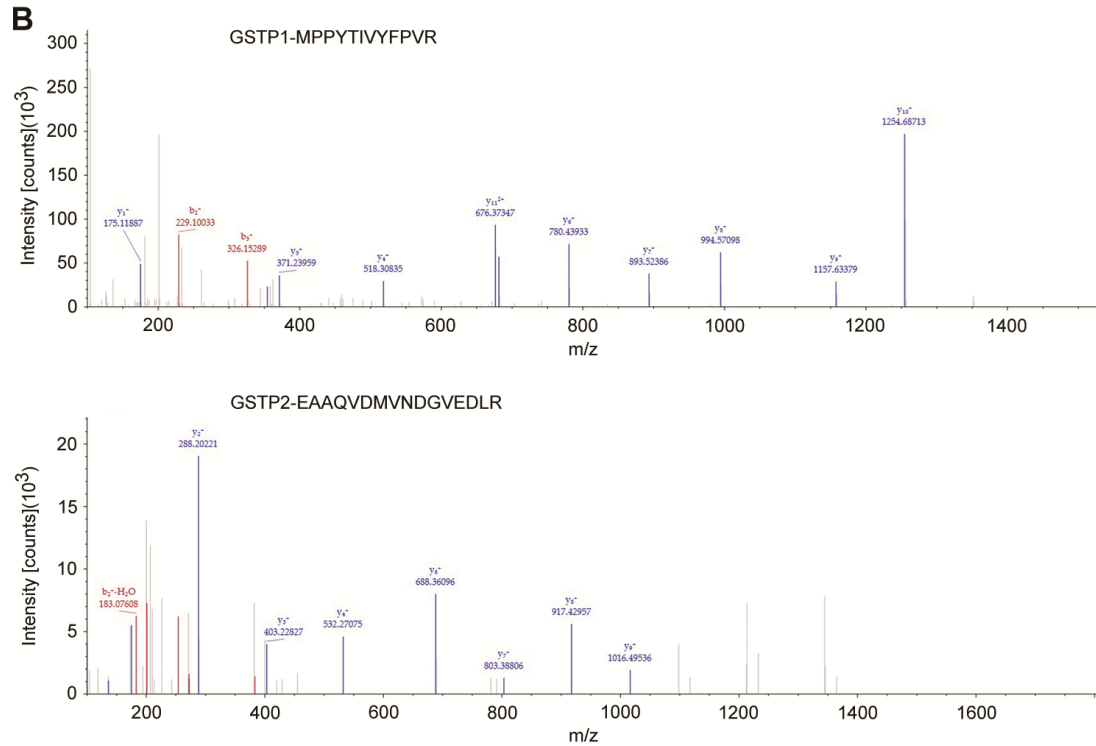

70

71 **Fig. S8. Identification of GSTP1 and GSTP2 by mass spectrometry. (A)** Top 6 candidate proteins by

72 analyzing  $\Delta$ PSM (wildtype - L-G9a<sup>-/-</sup>). **(B)** Unique peptides of GSTP1 and GSTP2 identified by MS.

73 GSTA4, glutathione S-transferase A4; MGST1, microsomal glutathione S-transferase 1; CATB,

74 cathepsin B; SPRE, sepiapterin reductase.

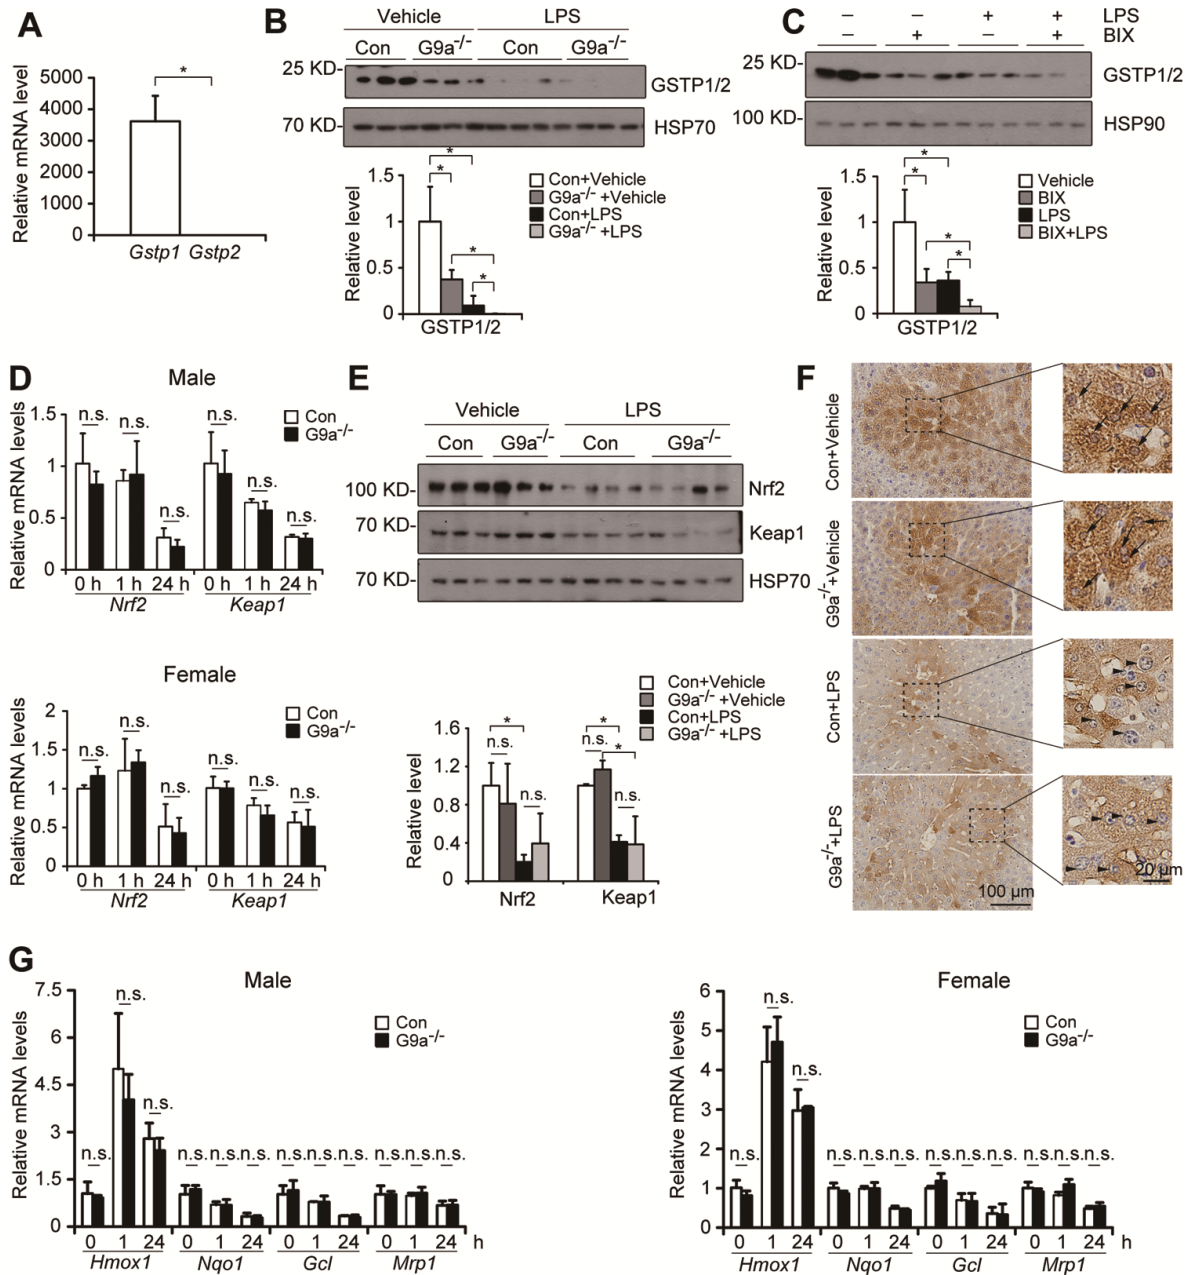

75

76 **Fig. S9. G9a-deficiency-caused downregulation of GSTP1/2 is not regulated by Nrf2.** (A) Relative  
 77 mRNA levels of *Gstp1* and *Gstp2* in livers of the wildtype male mice. (B-C) Representative western  
 78 blots (up) and quantitative results (down) for GSTP1/2 in livers upon LPS injury in female mice (B) and  
 79 BIX with LPS co-treatment in male mice (C). (D) Relative mRNA levels of *Nrf2* and *Keap1* in livers of  
 80 the male (up) and female (down) control and L-*G9a*<sup>-/-</sup> mice at 0, 1 or 24 hours after LPS injection. (E)

81 Representative western blots (*up*) and quantitative results (*down*) for Nrf2 and Keap1 in livers of the  
82 control and L-G9a<sup>-/-</sup> male mice at 24 hours after LPS injection. (F) Representative pictures of Nrf2  
83 staining in the livers of different groups. Nucleus with or without Nrf2 staining were marked by arrows  
84 or arrowheads, respectively. (G) Relative mRNA levels of *Hmox1*, *Nqo1*, *Gcl* and *Mrp1* in livers of the  
85 control and L-G9a<sup>-/-</sup> mice at 0, 1 or 24 hours after LPS injection. HSP70 or HSP90 serves as the loading  
86 control. n=3-4 per group; n.s., not significant; \**p* < 0.05.

87

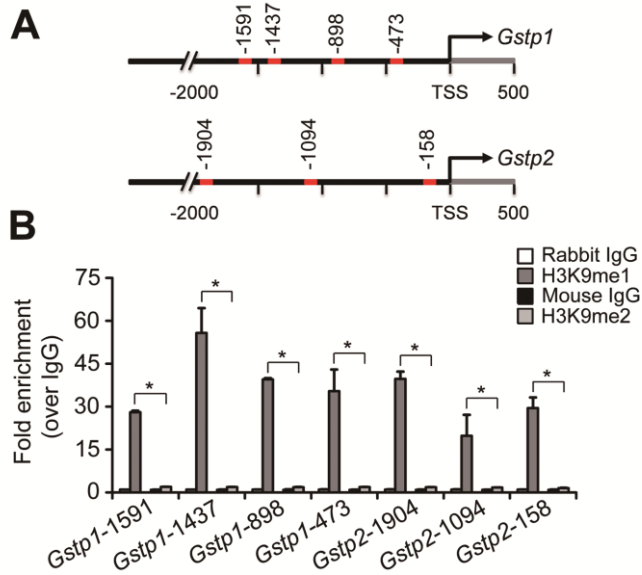

88

89 **Fig. S10. H3K9me1/me2 levels at promoters of *Gstp1/2* in the livers of wildtype mice. (A)** Locations

90 of primers used for ChIP-qPCR. **(B)** ChIP-qPCR analysis of H3K9me1 and H3K9me2 levels at the

91 various regions of promoters of *Gstp1* and *Gstp2* in livers of control mice. n=3 per group; \* $p < 0.05$ .

92

93

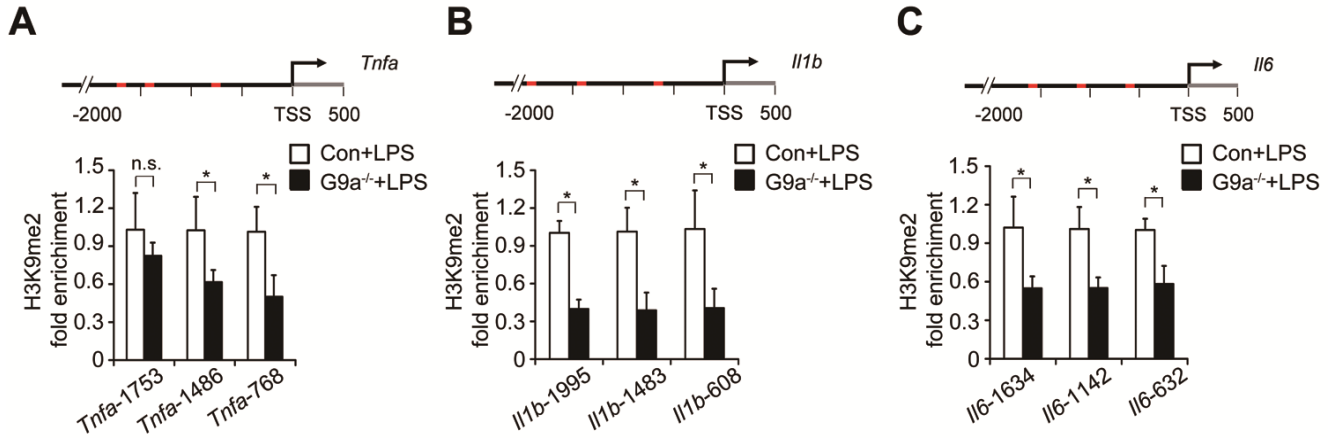

94

95 **Fig. S11. H3K9me2 levels on the promoters of inflammatory genes in the livers of the control and**

96 **L-G9a<sup>-/-</sup> mice upon LPS injection.** (A-C) Locations of primers used for ChIP-qPCR (*up*) and the ChIP-

97 qPCR analysis of the H3K9me2 at various promoter regions of inflammatory genes (*down*) such as *Tnfa*

98 (*A*), *Il1b* (*B*) and *Il6* (*C*). n=4 per group; n.s., not significant; \**p* < 0.05.

99

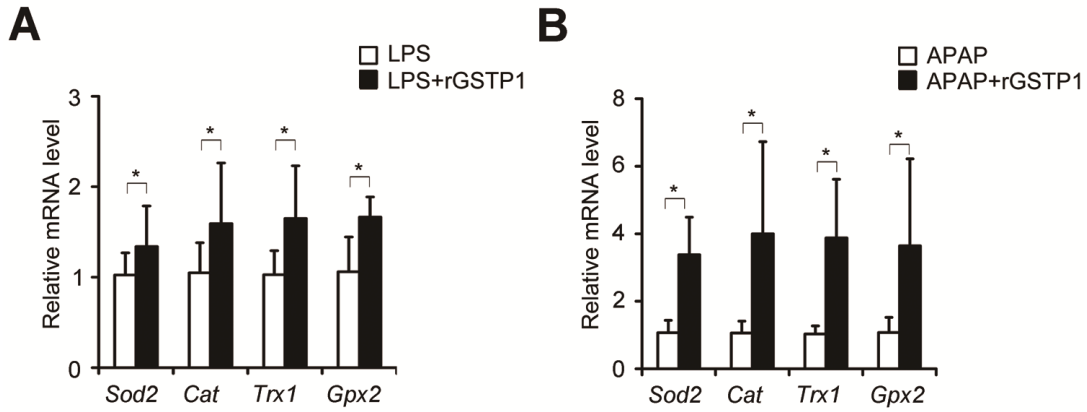

100

101 **Fig. S12. rGSTP1 upregulates redox and detoxification genes in L-G9a<sup>-/-</sup> mice upon LPS- or**

102 **APAP- induced liver damage. (A-B) Relative mRNA level of some redox and detoxification genes in**

103 **the livers of indicated groups upon LPS- (A) or APAP- (B) stress. All these data were obtained from**

104 **male L-G9a<sup>-/-</sup> mice. n=4-6 per group; \*  $p < 0.05$ .**

105

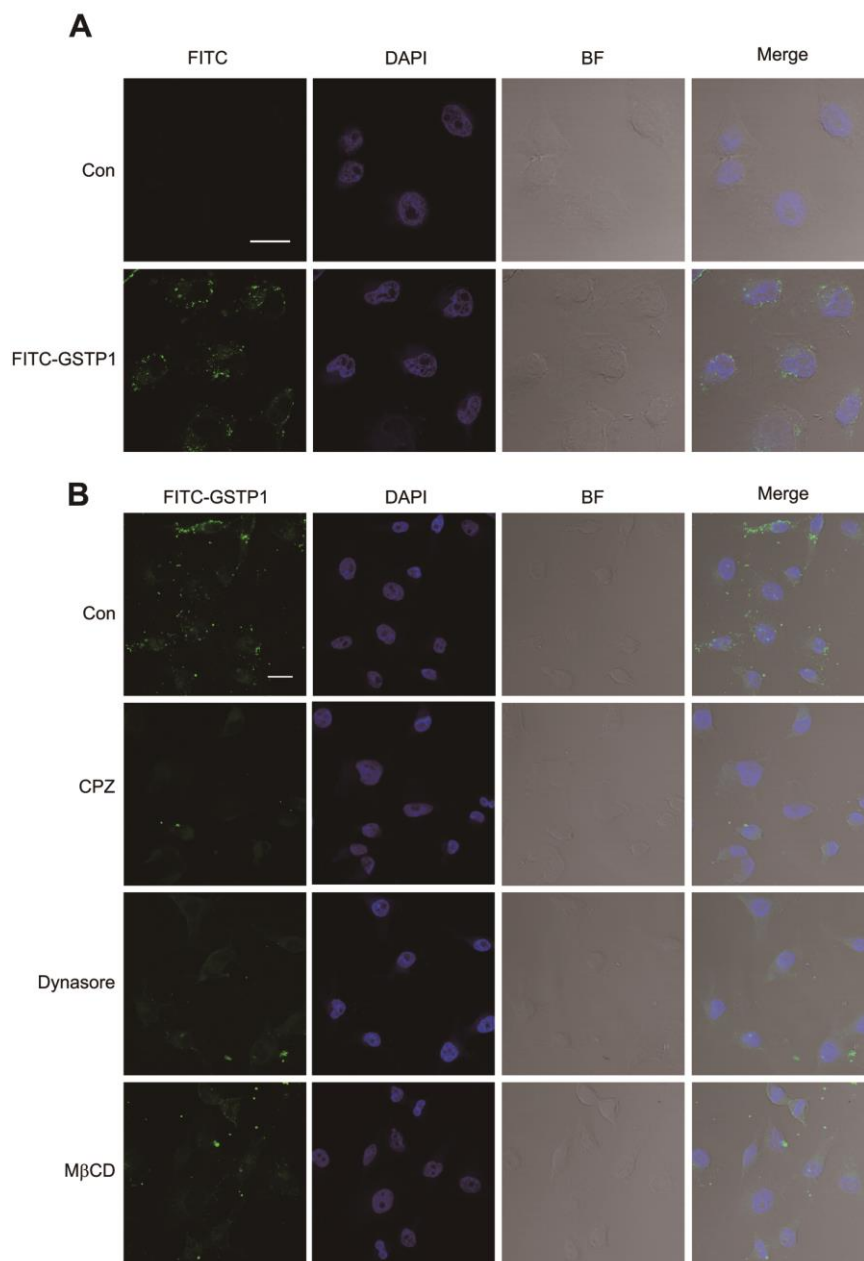

106

107 **Fig. S13. rGSTP1 may be transported into cells by clathrin-dependent endocytosis. (A)**

108 Representative pictures of the transport of FITC-labeled rGSTP1 into Hepa1-6 cells. (B) Representative

109 pictures of the intracellular localization of FITC-labeled rGSTP1 in Hepa1-6 cells after the treatment of

110 different endocytosis inhibitors. Scale bar, 20  $\mu$ m.

111



**Table S1 Information of materials used in the present study**

| <b>Antibodies</b> |                    |                       |
|-------------------|--------------------|-----------------------|
| <b>Antibodies</b> | <b>Vendor</b>      | <b>Catalog number</b> |
| G9a               | Abcam (for WB)     | 31874                 |
| G9a               | Abcam (for ChIP)   | 185050                |
| GLP               | Bioss              | 16789                 |
| H3K9me2           | Abcam              | 1220                  |
| H3K9me1           | Abcam              | 9045                  |
| Histone H3        | Cell Signaling     | 9715                  |
| HSP70             | BD Biosciences     | 03719                 |
| HSP90             | BD Biosciences     | 03717                 |
| VCAM-1            | Santa Cruz         | 8304                  |
| ICAM-1            | Santa Cruz         | 1511                  |
| MCP-1             | Santa Cruz         | 1785                  |
| iNOS              | BD Biosciences     | 610431                |
| eNOS              | BD Biosciences     | 610298                |
| 3-Nitrotyrosine   | Millipore          | MAB5404               |
| p-Chk2            | Cell Signaling     | 2197                  |
| p-Chk1            | Cell Signaling     | 2348                  |
| p-p53             | Cell Signaling     | 9284                  |
| p53               | Santa Cruz Bio     | 99                    |
| p-H2A.X           | Cell Signaling     | 9718                  |
| PARP-1            | ENZO Life Sciences | ALX-804-211           |
| Caspase3          | Cell Signaling     | 9662                  |
| Caspase8          | Beyotime           | AC056                 |

|        |                          |          |
|--------|--------------------------|----------|
| GSTP1  | Santa Cruz               | 28494    |
| Nrf2   | Santa Cruz (for WB)      | 365949   |
| Nrf2   | Cell Signaling (for IHP) | 12721    |
| Keap1  | Santa Cruz               | 33569    |
| F4/80  | Santa Cruz               | 52664    |
| Ly-6G  | BD Biosciences           | 551459   |
| CD3    | Gene Tech                | GA045229 |
| 8-oxoG | Santa Cruz               | 130914   |

---

### qPCR primers

| Genes        | Species      | Sequences                                                           |
|--------------|--------------|---------------------------------------------------------------------|
| <i>Ehmt2</i> | <i>Mouse</i> | Forward: TCGGGCAATCAGTCAGACAG<br>Reverse: TGAGGAACCCACACCATTAC      |
| <i>Ehmt1</i> | <i>Mouse</i> | Forward: GAACAGGAGTCTCCCGACAC<br>Reverse: GGGCTGTCAGTCTTCCCTC       |
| <i>Tnfa</i>  | <i>Mouse</i> | Forward: GGTGATCGGTCCCCAAAGGGATGA<br>Reverse: TGGTTTGCTACGACGTGGGCT |
| <i>Il1b</i>  | <i>Mouse</i> | Forward: GAAGAAGAGCCCATCCTCTG<br>Reverse: TCATCTCGGAGCCTGTAGTG      |
| <i>Il6</i>   | <i>Mouse</i> | Forward: CACTTCACAAGTCGGAGGCT<br>Reverse: CTGCAAGTGCATCATCGTTGT     |
| <i>Mcp-1</i> | <i>Mouse</i> | Forward: GCTCTCTCTCCTCCACCAC<br>Reverse: GCGTTAACTGCATCTGGCT        |
| <i>Atf3</i>  | <i>Mouse</i> | Forward: CTCTCACCTCCTGGGTCCT<br>Reverse: TCTGGATGGCGAATCTCAGC       |
| <i>Cox2</i>  | <i>Mouse</i> | Forward: CAACACCTGAGCGGTTACCA                                       |

---

---

|              |              |                                   |
|--------------|--------------|-----------------------------------|
|              |              | Reverse: TTCAGAGGCAATGCGGTTCT     |
| <i>Hmox1</i> | <i>Mouse</i> | Forward: CCTCACAGATGGCGTCACTT     |
|              |              | Reverse: GCTGATCTGGGGTTTCCCTC     |
| <i>Gstp1</i> | <i>Mouse</i> | Forward: GCGGCAAATATGTCACCCTCAT   |
|              |              | Reverse: GCAGGGTCTCAAAGGCTTC      |
| <i>Gstp2</i> | <i>Mouse</i> | Forward: ATATGGCACCATGATCTACAGAAA |
|              |              | Reverse: TCTGGTCACCCACGATGAAA     |
| <i>Nrf2</i>  | <i>Mouse</i> | Forward: CCTCTGTCACCAGCTCAAGG     |
|              |              | Reverse: TTGATGACCAGGACTCACGG     |
| <i>Keap1</i> | <i>Mouse</i> | Forward: GTGGCACCTACAGAGACACC     |
|              |              | Reverse: GCGCTTGGAGAAGGGCA        |
| <i>Nqo1</i>  | <i>Mouse</i> | Forward: CATTGCAGTGGTTTGGGGTG     |
|              |              | Reverse: TCTGGAAAGGACCGTTGTCTG    |
| <i>Gcl</i>   | <i>Mouse</i> | Forward: AGCTTTGGGTCGCAAGTAGG     |
|              |              | Reverse: GGTCTCGCGCTCCCAC         |
| <i>Mrp1</i>  | <i>Mouse</i> | Forward: CAAAGCCGGTGGAAAATGGG     |
|              |              | Reverse: GTGGGAAGACGAGTTGCTGA     |
| <i>Sod2</i>  | <i>Mouse</i> | Forward: TAACGCGCAGATCATGCAGCTG   |
|              |              | Reverse: AGGCTGAAGAGCGACCTGAGTT   |
| <i>Cat</i>   | <i>Mouse</i> | Forward: TGAGAAGCCTAAGAACGCAATTC  |
|              |              | Reverse: CCCTTCGCAGCCATGTG        |
| <i>Trx1</i>  | <i>Mouse</i> | Forward: GAAATGCATGCCGACCTTCCAG   |
|              |              | Reverse: GCTGGTTACACTTTTCAGAGCATG |
| <i>Gpx2</i>  | <i>Mouse</i> | Forward: TGTGACGTCAATGGGCAGAA     |
|              |              | Reverse: GTCATGAGGGAGAACGGGTC     |

---

| <i>β-actin</i>           | <i>Mouse</i>                    | Forward: GGCTACAGCTTCACCACCAC<br>Reverse: TAGCTCTTCTCCAGGGAGGA        |
|--------------------------|---------------------------------|-----------------------------------------------------------------------|
| <b>ChIP-qPCR primers</b> |                                 |                                                                       |
| Name                     | promoter region<br>(+1 for TSS) | Sequences                                                             |
| <i>Gstp1-1591</i>        | -1591 to -1506                  | Forward: AAGGGGGCCCCATGTTGA<br>Reverse: ATCCAAAGCCAGGGAATTAGCTCTG     |
| <i>Gstp1-1437</i>        | -1437 to -1344                  | Forward: ACCTTGCTGGTGATACGTGAG<br>Reverse: CTCCTCGGTGTCTTACTTACTCTG   |
| <i>Gstp1-898</i>         | -898 to -751                    | Forward: TGGCCTGTTTAAAGGTGGAGAA<br>Reverse: TGTGAGAATAGGGACAAATCTTGAG |
| <i>Gstp1-473</i>         | -473 to -375                    | Forward: TCCAACCCTGTTAGTCTCGTTT<br>Reverse: CCTTCGCCAGGAGTAATCAG      |
| <i>Gstp2-1904</i>        | -1904 to -1832                  | Forward: GCCCAGAACCTCAGTGATGAA<br>Reverse: TGCACTGTAGCGTCACATTCT      |
| <i>Gstp2-1094</i>        | -1094 to -1014                  | Forward: TGCGGGAGGAAAGAGTGAGA<br>Reverse: GTGTCTCCCTGGGTAATGGG        |
| <i>Gstp2-158</i>         | -158 to -40                     | Forward: ACATGCTAGTGTCTCGGGC<br>Reverse: TATAAGGGGCATTGCGCTC          |
| <i>Tnfa-1753</i>         | -1753 to -1669                  | Forward: TTCTTTGGAGCCTTTGCACT<br>Reverse: ACCCTTGAAACAACGGTCAG        |
| <i>Tnfa-1486</i>         | -1486 to -1329                  | Forward: GGACATGAAGGAGGGACAGA<br>Reverse: CACCTTTGTGTCTGGGACCT        |
| <i>Tnfa-768</i>          | -768 to -523                    | Forward: CGCAGTCAAGATATGGCAGA<br>Reverse: CTTGGAGGAAGTGGCTGAAG        |

---

|                  |                |                                                                |
|------------------|----------------|----------------------------------------------------------------|
| <i>Il1b-1995</i> | -1995 to -1823 | Forward: CTCCAAATCCTCCCAGACAA<br>Reverse: AAGGGTAACTAGGGGCCTGA |
| <i>Il1b-1483</i> | -1483 to -1431 | Forward: ATAGCTGGTCAAAGGCAGGA<br>Reverse: GCATCTCGATTTCAGGAAGG |
| <i>Il1b-608</i>  | -608 to -512   | Forward: AAGCACCTGGCATTATCAG<br>Reverse: AGGGCACACACAGTATGCAG  |
| <i>Il6-1634</i>  | -1634 to -1502 | Forward: CACACGGTGAAAGAATGGTG<br>Reverse: AAAGCCGGTTGATTCTTGTG |
| <i>Il6-1142</i>  | -1142 to -1038 | Forward: GGTGGACAGAAAACCAGGAA<br>Reverse: TAACCCCTCCAATGCTCAAG |
| <i>Il6-632</i>   | -632 to -527   | Forward: TGCACAAAATTTGGAGGTGA<br>Reverse: ACCCAACCTGGACAACAGAC |

---

113 TSS, transcription starting site.
